# Supplementary material for: Willingness of the Jordanian Population to Receive a COVID-19 Booster Dose: A Cross-Sectional Study
Source: Vaccines (Basel). 2022 Mar 9;10(3):410. doi: 10.3390/vaccines10030410 (PMC8950968; doi:10.3390/vaccines10030410)
Supplement: Supplementary file 1 [file vaccines-10-00410-s001.zip › vaccines-1612046-supplementary.pdf]

## Supplementary Files

Table S1. The English translation of the questionnaire used in the study

|                                                                                                                                                                  |
|------------------------------------------------------------------------------------------------------------------------------------------------------------------|
| <b>1-Have you received the complete vaccination course (two doses)?</b>                                                                                          |
| <ul style="list-style-type: none"> <li>• Yes</li> <li>• No (Automatic submission)</li> </ul>                                                                     |
| <b>2-Are you currently living in Jordan?</b>                                                                                                                     |
| <ul style="list-style-type: none"> <li>• Yes</li> <li>• No (Automatic submission)</li> </ul>                                                                     |
| <b>3-Are 18 or above ?</b>                                                                                                                                       |
| <ul style="list-style-type: none"> <li>• Yes</li> <li>• No (Automatic submission)</li> </ul>                                                                     |
| <b>PART ONE (DEMOGRAPHICS)</b>                                                                                                                                   |
| <b>4-What is your age?</b>                                                                                                                                       |
| <ul style="list-style-type: none"> <li>• 18-29 years</li> <li>• 30-39 years</li> <li>• 40-49 years</li> <li>• 50-59 years</li> <li>• 60 years or more</li> </ul> |
| <b>5-Sex</b>                                                                                                                                                     |
| <ul style="list-style-type: none"> <li>• Male (go to question 7)</li> <li>• Female</li> </ul>                                                                    |
| <b>6- Are you pregnant?</b>                                                                                                                                      |
| <ul style="list-style-type: none"> <li>• Yes</li> <li>• No</li> </ul>                                                                                            |
| <b>7-Do you have children?</b>                                                                                                                                   |
| <ul style="list-style-type: none"> <li>• No</li> <li>• Yes</li> </ul>                                                                                            |
| <b>8-Do you Smoke?</b>                                                                                                                                           |
| <ul style="list-style-type: none"> <li>• Yes</li> <li>• No</li> </ul>                                                                                            |
| <b>9-Marital status</b>                                                                                                                                          |
| <ul style="list-style-type: none"> <li>• Married</li> <li>• Other</li> </ul>                                                                                     |
| <b>10-Please choose the most similar shape to your body</b>                                                                                                      |

|                                                                                                                                                                                                                   |  |
|-------------------------------------------------------------------------------------------------------------------------------------------------------------------------------------------------------------------|--|
| 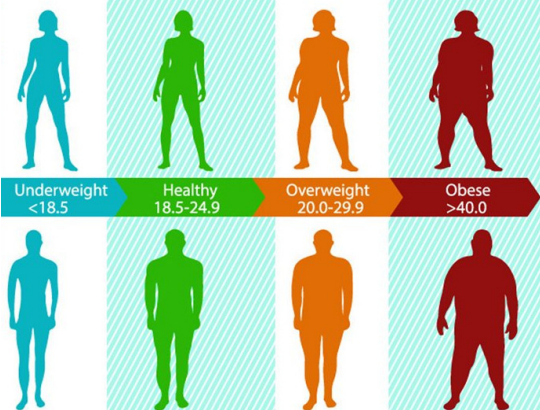                                                                                                                                 |  |
| <ul style="list-style-type: none"> <li>• Blue</li> <li>• Green</li> <li>• Orange</li> <li>• Brown</li> </ul>                                                                                                      |  |
| <b>11-Your weight in Kg is</b> _____                                                                                                                                                                              |  |
| <b>12-Your Height in cm is</b> _____                                                                                                                                                                              |  |
| <b>13-Education level</b>                                                                                                                                                                                         |  |
| <ul style="list-style-type: none"> <li>• High school or less</li> <li>• University student</li> <li>• Diploma</li> <li>• Bachelor's degree</li> <li>• Postgraduate</li> </ul>                                     |  |
| <b>14-Area of Residency</b>                                                                                                                                                                                       |  |
| <ul style="list-style-type: none"> <li>• North region</li> <li>• South region</li> <li>• Zarqa</li> <li>• Middle region</li> <li>• Amman</li> <li>• Other</li> </ul>                                              |  |
| <b>15-Do you suffer from a chronic disease?</b>                                                                                                                                                                   |  |
| <ul style="list-style-type: none"> <li>• Yes</li> <li>• No (go to question 8)</li> </ul>                                                                                                                          |  |
| <b>16-Do you suffer from any of the following conditions: Type 2 diabetes mellitus/Chronic Obstructive Pulmonary Disease (COPD)/Cancer/Kidney Failure/Heart diseases/Organ transplantation/Sickle Cell Anemia</b> |  |
| <ul style="list-style-type: none"> <li>• Yes</li> <li>• No</li> </ul>                                                                                                                                             |  |

|                                                                                                                                                                                                                                                                                |     |       |    |
|--------------------------------------------------------------------------------------------------------------------------------------------------------------------------------------------------------------------------------------------------------------------------------|-----|-------|----|
| <b>17-Do you suffer from any of the following conditions: Type 1 diabetes mellitus/Hypertension/Bone marrow transplant/ Cerebrovascular diseases or stroke/ Cystic Fibrosis/Asthma/Taking steroids or immunosuppressant drugs/Hepatic diseases/ Thalassemia/Lung fibrosis.</b> |     |       |    |
| <ul style="list-style-type: none"> <li>• Yes</li> <li>• No</li> </ul>                                                                                                                                                                                                          |     |       |    |
| <b>18-Household average monthly income</b>                                                                                                                                                                                                                                     |     |       |    |
| <ul style="list-style-type: none"> <li>• Less than 500 JD</li> <li>• 500-1000 JD</li> <li>• More than 1000 JD</li> </ul>                                                                                                                                                       |     |       |    |
| <b>PART TWO (PERCEPTIONS OF COVID-19)</b>                                                                                                                                                                                                                                      |     |       |    |
| <b>19-In your opinion, how serious is COVID-19?</b>                                                                                                                                                                                                                            |     |       |    |
| <ul style="list-style-type: none"> <li>• 1(not serious)</li> <li>• 2</li> <li>• 3</li> <li>• 4</li> <li>• 5 (extremely serious)</li> </ul>                                                                                                                                     |     |       |    |
| <b>20-Have you ever been infected with COVID-19?</b>                                                                                                                                                                                                                           |     |       |    |
| <ul style="list-style-type: none"> <li>• Yes</li> <li>• Maybe</li> <li>• No</li> </ul>                                                                                                                                                                                         |     |       |    |
| <b>21-Do you know anyone who has died due to COVID-19?</b>                                                                                                                                                                                                                     |     |       |    |
| <ul style="list-style-type: none"> <li>• Yes</li> <li>• No</li> </ul>                                                                                                                                                                                                          |     |       |    |
| <b>PART THREE (Knowledge of COVID-19, and practices to protect against COVID-19 infection)</b>                                                                                                                                                                                 |     |       |    |
| <b>22- What are the symptoms of COVID19?</b>                                                                                                                                                                                                                                   | Yes | Maybe | No |
| Fever                                                                                                                                                                                                                                                                          |     |       |    |
| Chills                                                                                                                                                                                                                                                                         |     |       |    |
| Diarrhea                                                                                                                                                                                                                                                                       |     |       |    |
| Cough                                                                                                                                                                                                                                                                          |     |       |    |
| Otitis media                                                                                                                                                                                                                                                                   |     |       |    |
| Loss of smell and taste                                                                                                                                                                                                                                                        |     |       |    |
| No symptoms                                                                                                                                                                                                                                                                    |     |       |    |

|                                                                                                                       |        |                   |            |        |       |
|-----------------------------------------------------------------------------------------------------------------------|--------|-------------------|------------|--------|-------|
| <b>23- How is COVID19 transmitted?</b>                                                                                |        |                   | Yes        | Maybe  | No    |
| Drinking unclean water                                                                                                |        |                   |            |        |       |
| Eating unclean food                                                                                                   |        |                   |            |        |       |
| Inhalation of respiratory droplets from an infected person                                                            |        |                   |            |        |       |
| Eating or touching wild animals                                                                                       |        |                   |            |        |       |
| Medical herb consumption                                                                                              |        |                   |            |        |       |
| <b>24- What procedure do you think that may prevent COVID19 infection?</b>                                            |        |                   | Yes        | Maybe  | No    |
| Wearing face masks                                                                                                    |        |                   |            |        |       |
| Washing hands with regular soap                                                                                       |        |                   |            |        |       |
| Using detergents                                                                                                      |        |                   |            |        |       |
| Social distancing                                                                                                     |        |                   |            |        |       |
| Avoiding touching face/mouth/nose/eyes                                                                                |        |                   |            |        |       |
| <b>25-Management of COVID-19</b>                                                                                      |        |                   | Yes        | Maybe  | No    |
| Is there currently a drug in pharmacies or hospitals that treats COVID-19 completely?                                 |        |                   |            |        |       |
| <b>26-How often do you adhere to the following protective practices against COVID-19</b>                              | Always | Most of the times | Some times | Rarely | Never |
| Wearing face masks                                                                                                    |        |                   |            |        |       |
| Washing hands with regular soap                                                                                       |        |                   |            |        |       |
| Social distancing                                                                                                     |        |                   |            |        |       |
| Avoiding touching face/mouth/nose/eyes                                                                                |        |                   |            |        |       |
| Using detergent                                                                                                       |        |                   |            |        |       |
| <b>PART FOUR (Previous COVID-19 vaccination)</b>                                                                      |        |                   |            |        |       |
| <b>27-In your opinion, how severe were the symptoms you experienced due to COVID-19 vaccine?</b>                      |        |                   |            |        |       |
| <ul style="list-style-type: none"> <li>• Mild</li> <li>• Moderate</li> <li>• Severe</li> <li>• No symptoms</li> </ul> |        |                   |            |        |       |
| <b>28-Did you take the COVID-19 vaccine out of conviction, or were you forced by laws imposed by the state?</b>       |        |                   |            |        |       |

|                                                                                                                                                                                                                                                                                                                                                 |            |              |           |
|-------------------------------------------------------------------------------------------------------------------------------------------------------------------------------------------------------------------------------------------------------------------------------------------------------------------------------------------------|------------|--------------|-----------|
| <ul style="list-style-type: none"> <li>• I took it out of conviction</li> <li>• I took it out of conviction and because of the laws</li> <li>• I took it because of the imposed laws, not because I believe in it</li> </ul>                                                                                                                    |            |              |           |
| <b>29-Which COVID-19 vaccine type did you receive?</b>                                                                                                                                                                                                                                                                                          |            |              |           |
| <ul style="list-style-type: none"> <li>• Pfizer</li> <li>• AstraZeneca</li> <li>• Sinopharm</li> </ul>                                                                                                                                                                                                                                          |            |              |           |
| <b>30-Which side-effects did you suffer from due to COVID-19 vaccine? (You can choose more than one)</b>                                                                                                                                                                                                                                        |            |              |           |
| <ul style="list-style-type: none"> <li>• Headache</li> <li>• Hyperthermia</li> <li>• Pain at site of injection</li> <li>• Muscle pain</li> <li>• Weakness</li> <li>• Spasm</li> <li>• Nausea</li> <li>• Rash</li> <li>• Chills</li> <li>• Water retention</li> <li>• No symptoms</li> </ul>                                                     |            |              |           |
| <b>PART FIVE (Knowledge about the booster dose)</b>                                                                                                                                                                                                                                                                                             |            |              |           |
| <b>31-Is it necessary for the booster dose of the vaccine to be of the same type of vaccine used in the initial doses?</b>                                                                                                                                                                                                                      | <b>Yes</b> | <b>Maybe</b> | <b>No</b> |
| <b>32-What is the protective time period for that the vaccine provides against COVID-19?</b>                                                                                                                                                                                                                                                    |            |              |           |
| <ul style="list-style-type: none"> <li>• Several Months</li> <li>• A year</li> <li>• Several Years</li> <li>• Forever</li> </ul>                                                                                                                                                                                                                |            |              |           |
| <b>33-Which people need the booster dose?</b>                                                                                                                                                                                                                                                                                                   |            |              |           |
| <ul style="list-style-type: none"> <li>• The elderly</li> <li>• People with immunosuppressant diseases</li> <li>• People with cardiovascular disease</li> <li>• People with renal disease</li> <li>• People with pulmonary diseases</li> <li>• Everybody should receive the booster dose unless contraindicated (Allergic reactions)</li> </ul> |            |              |           |
| <b>PART SIX (Intention to receive COVID-19 vaccine booster dose)</b>                                                                                                                                                                                                                                                                            |            |              |           |
| <b>34-Are you willing to receive the booster dose for COVID-19 vaccine?</b>                                                                                                                                                                                                                                                                     |            |              |           |

|                                                                                                                                                                                                                                                                                                                                                                                                                                                                                                                                                                                                                                                                                                                                                                                                                                                                                                                                                                                                                                 |            |           |
|---------------------------------------------------------------------------------------------------------------------------------------------------------------------------------------------------------------------------------------------------------------------------------------------------------------------------------------------------------------------------------------------------------------------------------------------------------------------------------------------------------------------------------------------------------------------------------------------------------------------------------------------------------------------------------------------------------------------------------------------------------------------------------------------------------------------------------------------------------------------------------------------------------------------------------------------------------------------------------------------------------------------------------|------------|-----------|
| <ul style="list-style-type: none"> <li>• Yes (Automatic submission)</li> <li>• No</li> <li>• May</li> </ul>                                                                                                                                                                                                                                                                                                                                                                                                                                                                                                                                                                                                                                                                                                                                                                                                                                                                                                                     |            |           |
| <b>35- Which of the following reasons make you hesitant towards receiving the COVID-19 booster dose?</b>                                                                                                                                                                                                                                                                                                                                                                                                                                                                                                                                                                                                                                                                                                                                                                                                                                                                                                                        | <b>Yes</b> | <b>No</b> |
| <ul style="list-style-type: none"> <li>• The booster dose will not provide me with any further protection against COVID-19.</li> <li>• The booster dose will have severe side effects.</li> <li>• I can't tolerate another dose because the side-effects of the previous ones were severe.</li> <li>• I was infected with COVID-19, therefore I do not need the booster dose.</li> <li>• The symptoms I experienced due to COVID-19 infection were mild; therefore, I will not receive the booster dose.</li> <li>• Taking the booster dose now has no benefit, however I may receive it in the future.</li> <li>• I took the last dose a short time ago, and there will be no need to take the booster dose for at least a year.</li> <li>• The benefits of booster doses have not been scientifically proven.</li> <li>• The booster dose is a conspiracy to boost corporate profits.</li> <li>• A booster dose will be imposed only based on agreements reached between pharmaceutical companies and governments.</li> </ul> |            |           |

**Table S2 Knowledge towards COVID-19 and its vaccines**

| <b>How is COVID19 transmitted?</b>                                                                               | <b>Frequency (%)</b> |
|------------------------------------------------------------------------------------------------------------------|----------------------|
| Drinking unclean water                                                                                           | 513 (56.1)           |
| Eating unclean food                                                                                              | 494 (54.0%)          |
| Inhalation of respiratory droplets from an infected person                                                       | 884 (96.6%)          |
| Eating or touching wild animals                                                                                  | 393 (43.0%)          |
| Medical herb consumption                                                                                         | 213 (23.3%)          |
| <b>What are the symptoms of COVID19?</b>                                                                         |                      |
| Fever                                                                                                            | 872 (95.3%)          |
| Chills                                                                                                           | 693 (75.7%)          |
| Diarrhea                                                                                                         | 564 (61.6%)          |
| Cough                                                                                                            | 772 (84.4%)          |
| Otitis media (earache)                                                                                           | 244 (26.7%)          |
| Loss of smell and taste                                                                                          | 877 (95.8%)          |
| No symptoms                                                                                                      | 704(76.9%)           |
| <b>What procedures do you think that may prevent COVID19 infection?</b>                                          |                      |
| Wearing face masks                                                                                               | 849 (92.8%)          |
| Washing hands with regular soap                                                                                  | 810 (88.5%)          |
| Using detergents                                                                                                 | 880 (96.2%)          |
| Social distancing                                                                                                | 869 (95.0%)          |
| Avoiding touching face/mouth/nose/eyes                                                                           | 843 (92.1%)          |
| <b>Management of COVID-19</b>                                                                                    |                      |
| Is there currently a drug in pharmacies or hospitals that treats COVID-19 completely?                            | 661 (72.2%)          |
| What is the protective time period that the vaccine provides against COVID-19?                                   | 638 (69.7%)          |
| Is it necessary for the booster dose of the vaccine to be of the same type of vaccine used in the initial doses? | 198 (21.6%)          |
| Which people need the booster dose?                                                                              | 442 (48.3%)          |

**Table S3. Adherence to protective practices against COVID-19**

|                                           | <b>Always-most of the time<br/>Frequency (%)</b> | <b>Mean (SD)</b>   |
|-------------------------------------------|--------------------------------------------------|--------------------|
| Wearing face masks                        | 793 (86.7%)                                      | 4.46 ( $\pm$ 0.85) |
| Washing hands with regular soap           | 839 (91.7%)                                      | 4.65 ( $\pm$ 0.74) |
| Social distancing                         | 689 (75.3%)                                      | 4.20 ( $\pm$ 0.97) |
| Avoiding touching<br>face/mouth/nose/eyes | 680 (74.4)                                       | 4.15 ( $\pm$ 1.07) |
| Using detergent                           | 806 (88%)                                        | 4.52 ( $\pm$ 0.80) |
